# Supplementary material
Source: publisher figshare collection journal article supplement (https://acs.figshare.com/ndownloader/files/23186345)
Supplement: Supplementary file 1 [file 23186345]

## ***Supporting Information***

### **Cluster-Type Filaments Induced by Doping in Low-Operation-Current Conductive Bridge Random Access Memory**

*Yiming Sun, Cheng Song\*, Siqi Yin, Leilei Qiao, Qin Wan, Jialu Liu, Rui Wang, Fei Zeng and  
Feng Pan\**

Key Laboratory of Advanced Materials (MOE), School of Materials Science and  
Engineering, Tsinghua University, Beijing 100084, China

E-mail: songcheng@mail.tsinghua.edu.cn, panf@mail.tsinghua.edu.cn

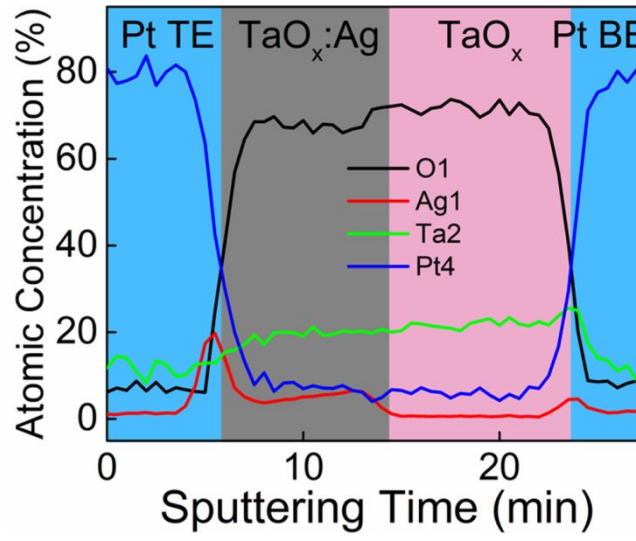

**Figure S1.** The atomic concentration in different depths in the initial state of Pt/TaO<sub>x</sub>:Ag/TaO<sub>x</sub>/Pt measured in the depth profile of auger electron spectroscopy. The location of each layer is marked by different color blocks.

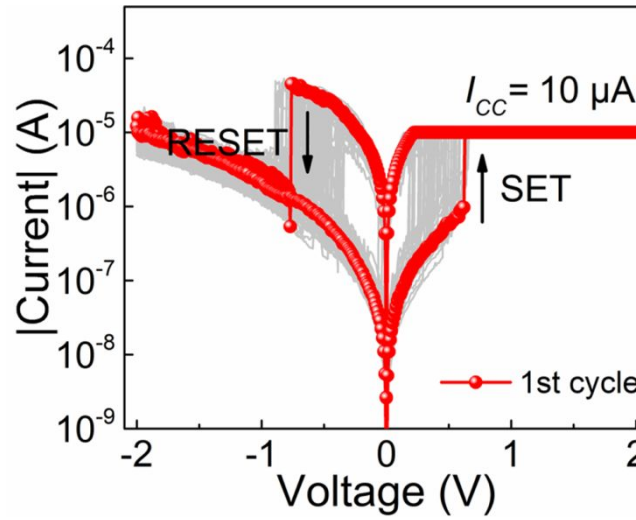

**Figure S2.** Resistive switching  $I$ - $V$  curves at the compliance current of 10  $\mu$ A including 1<sup>st</sup> cycle (red ball symbols) and subsequent 50 operations (gray curves).

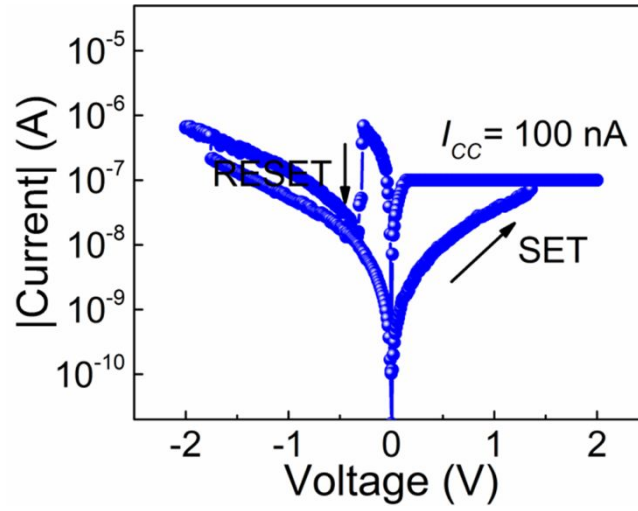

**Figure S3.** Resistive switching  $I$ - $V$  curve at the compliance current of 100 nA.

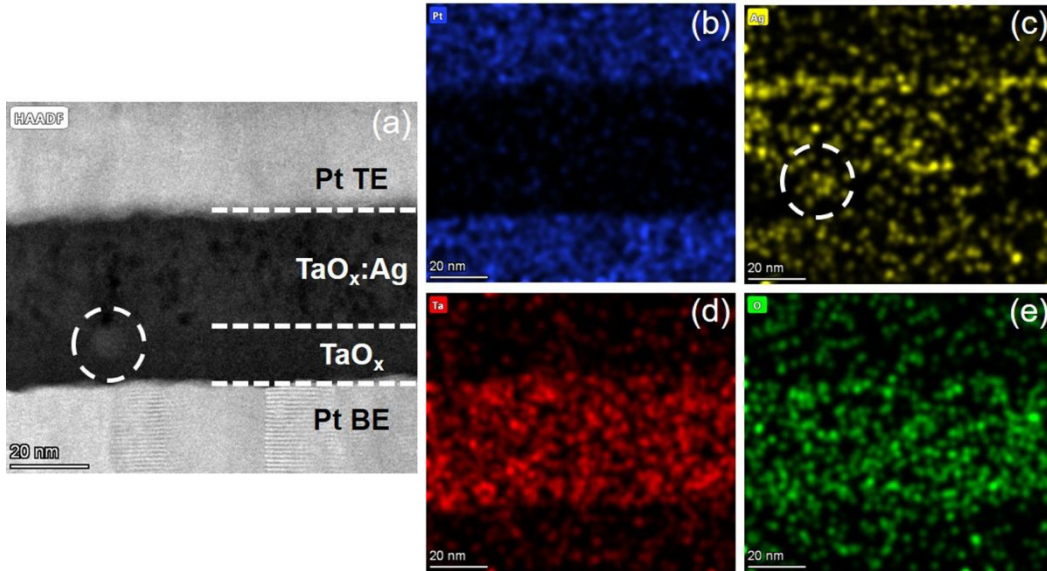

**Figure S4.** Mapping scan of energy dispersive X-ray analysis (EDX) of the Pt/TaO<sub>x</sub>:Ag/TaO<sub>x</sub>/Pt memory cell revealing the morphology and composition of conductive filaments. (a) High-angle annular dark field (HAADF) TEM image for EDX mapping scan. The multilayers are lined out. The map scanning results of (b) Pt, (c) Ag, (d) Ta and (e) O elements. The results demonstrate the clear interfaces between electrodes and dielectrics. A Ag cluster in the undoped TaO<sub>x</sub> layer is marked by a dotted white circle and the corresponding accumulation of pixels is shown in Ag element (Figure S4c), proving the morphology of conductive filaments and the composition of the clusters.

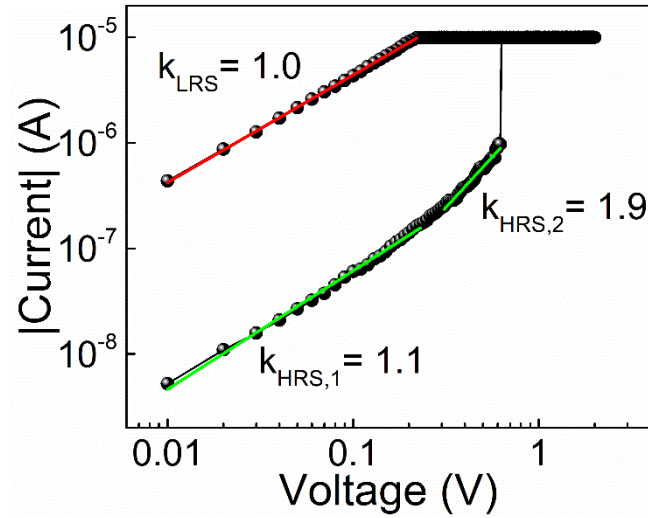

**Figure S5.** Log $I$ –Log $V$  curves of the LRS and HRS of the Pt/TaO<sub>x</sub>:Ag/TaO<sub>x</sub>/Pt cells.

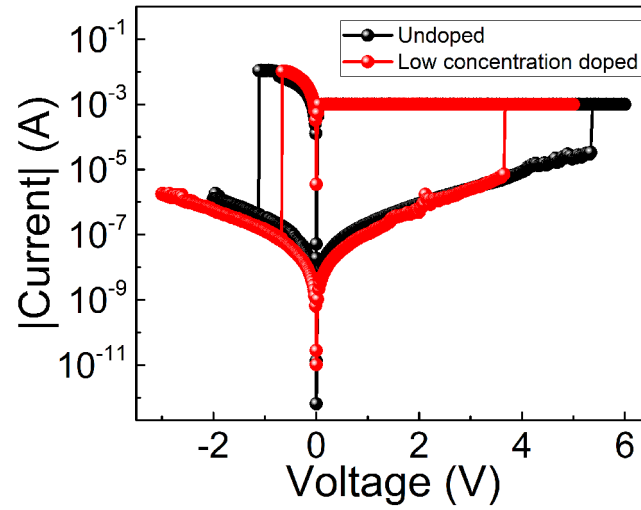

**Figure S6.** Typical DC  $I$ – $V$  curves of Pt/undoped TaO<sub>x</sub>/Pt and Pt/TaO<sub>x</sub>:Ag (low concentration)/TaO<sub>x</sub>/Pt memory devices. The RS cycles including unexpected SET processes possess larger threshold voltages, higher RESET currents and worse operation endurance.

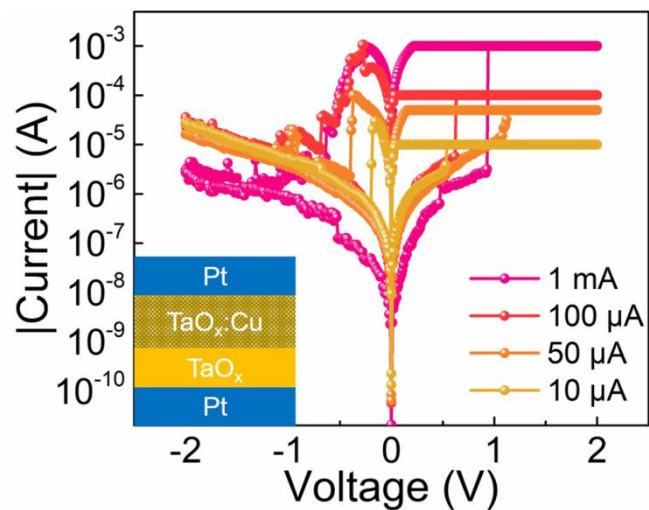

**Figure S7.** Typical DC  $I$ – $V$  characteristics of the Pt/TaO<sub>x</sub>:Cu/TaO<sub>x</sub>/Pt memory device under different  $I_{CC}$  of 1 mA, 100  $\mu$ A, 50  $\mu$ A and 10  $\mu$ A. The inset shows the schematic of the Pt/TaO<sub>x</sub>:Cu/TaO<sub>x</sub>/Pt memory device.
